# Supplementary material for: Responses of surface ozone to future agricultural ammonia emissions and subsequent nitrogen deposition through terrestrial ecosystem changes
Source: Copernicus journal article supplement (doi:10.5194/acp-21-17743-2021), 2021-12-03
Supplement: Supplementary file 1 [file acp-21-17743-2021-supplement.pdf]

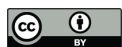

*Supplement of*

**Responses of surface ozone to future agricultural ammonia emissions and subsequent nitrogen deposition through terrestrial ecosystem changes**

**Xueying Liu et al.**

*Correspondence to:* Amos P. K. Tai (amostai@cuhk.edu.hk)

The copyright of individual parts of the supplement might differ from the article licence.

## S1 Implementation of soil NO<sub>x</sub> and NH<sub>3</sub> emission in CLM4.5-BGC

### S1.1 Soil NO<sub>x</sub>

We incorporate new equations to calculate NO<sub>x</sub> released as by-products of nitrification and denitrification. Default CLM estimates the amount of N<sub>2</sub>O leakage during nitrification by applying a constant scale factor to the nitrification rate (Li et al., 2000) while that from denitrification is variable and evaluated using the Century approach (Del Grosso et al., 2000). Building on the work of previous studies (Parton et al., 2001, 2004; Zhao et al., 2017), we compute a ratio of NO<sub>x</sub> to N<sub>2</sub>O to account for the leaking of the former during nitrification and denitrification using the following equations:

$$\text{NO}_x:\text{N}_2\text{O} = 15.2 + \frac{35.5 \tan^{-1}[0.68\pi(10D_r - 1.86)]}{\pi} \quad \text{Eq. 1}$$

where  $D_r$  is the relative gas diffusivity of soil vs. air and is calculated as a function of air-filled pore space (AFPS) of soil (Davidson and Trumbore, 1995):

$$D_r = 0.209\text{AFPS}^{\frac{4}{3}} \quad \text{Eq. 2}$$

$$\text{AFPS} = 1 - \frac{\theta_v}{\theta_{v,\text{sat}}} \quad \text{Eq. 3}$$

where  $\theta_v$  and  $\theta_{v,\text{sat}}$  are instantaneous and saturated volumetric soil water content (in m<sup>3</sup> m<sup>-3</sup>), respectively.

In addition, we also rectify a coding mistake in CLM by restoring a missing 20% of microbial mineralized nitrogen for nitrification to correct the rapid denitrification in previous versions (Parton et al., 2001), and applied a temperature factor to correct the overestimation at high latitudes as suggested in some previous studies (Xu and Prentice, 2008; Zhao et al., 2017):

$$f_T = \min\left(1, e^{308.56\left(\frac{1}{68.02} - \frac{1}{T_{\text{soil}} + 46.02}\right)}\right) \quad \text{Eq. 4}$$

where  $T_{\text{soil}}$  is soil temperature in Kelvin (K).

### S1.2 Soil NH<sub>3</sub>

We add into this model a new NH<sub>3</sub> emission scheme consistent with another standalone biogeochemical model, DNDC version 9.5 (Li et al., 2012), which has been used for studying agricultural NH<sub>3</sub> emission (Balasubramanian et al., 2015, 2017; Zhang and Niu, 2016).

For each model soil layer, NH<sub>3</sub> volatilization is considered as a multistage process, which is formulated as:

$$\frac{d[\text{NH}_3(\text{g})]}{dt}_{\text{soil}} = [\text{NH}_4^+(\text{soil})](1 - f_{\text{ads}})f_{\text{dis}}f_{\text{vol}}\left(\frac{1}{\Delta t}\right) \quad \text{Eq. 5}$$

where  $[\text{NH}_4^+(\text{soil})]$  (in g-N m<sup>-2</sup>) is the amount of soil NH<sub>4</sub><sup>+</sup>;  $\Delta t$  is model time step size in CLM (default = 30 min or 1800 s).

Due to electrostatic attraction, a portion of soil NH<sub>4</sub><sup>+</sup> adsorbs on the naturally negatively charged surface of soil particles. Our scheme estimates the fraction of NH<sub>4</sub><sup>+</sup> adsorbed,  $f_{\text{ads}}$ , as:

$$f_{\text{ads}} = 0.99(7.2733f_{\text{clay}}^3 - 11.22f_{\text{clay}}^2 + 5.7198f_{\text{clay}} + 0.0263) \quad \text{Eq. 6}$$

where  $f_{\text{clay}}$  is soil clay fraction as prescribed by the CLM surface data (Bonan et al., 2002).

The non-adsorbed  $\text{NH}_4^+$  dissociates reversibly into aqueous  $\text{NH}_3$  and hydrogen ion ( $\text{NH}_4^+_{(\text{aq})} \rightleftharpoons \text{NH}_3_{(\text{aq})} + \text{H}^+$ ). The fraction of such  $\text{NH}_4^+$  dissociated into aqueous  $\text{NH}_3$ ,  $f_{\text{dis}}$ , is determined by the following equations (Li et al., 2012):

$$f_{\text{dis}} = \frac{K_w}{K_a[\text{H}^+]} \quad \text{Eq. 7}$$

$$K_w = 10^{0.08946+0.03605T_{\text{soil}}} \times 10^{-15} \quad \text{Eq. 8}$$

$$K_a = (1.416 + 0.01357T_{\text{soil}}) \times 10^{-5} \quad \text{Eq. 9}$$

$$[\text{H}^+] = 10^{-\text{pH}} \quad \text{Eq. 10}$$

where  $K_a$  (in  $\text{mol L}^{-1}$ ) and  $K_w$  (in  $\text{mol L}^{-2}$ ) are dissociation constants for  $\text{NH}_4^+/\text{NH}_3$  and hydrogen-/hydroxide-ion equilibria, respectively;  $T_{\text{soil}}$  (in  $^{\circ}\text{C}$ ) is soil temperature;  $[\text{H}^+]$  (in  $\text{mol}$ ) is the concentration of aqueous hydrogen ion in the soil calculated from soil pH. The model has yet to be capable of calculating soil pH implicitly, and  $\text{NH}_3$  volatilization is sensitive to soil pH, so we perform our simulations using a constant pH of 6.8, as is adopted by DNDC, for a more concise analysis.

Lastly, we use this equation to calculate the fraction of aqueous  $\text{NH}_3$  volatilized as gaseous  $\text{NH}_3$ ,  $f_{\text{vol}}$ :

$$f_{\text{vol}} = \left( \frac{1.5s}{1+s} \right) \left( \frac{T_{\text{soil}}}{50 + T_{\text{soil}}} \right) \left( \frac{l_{\text{max}} - l}{l_{\text{max}}} \right) \quad \text{Eq. 11}$$

where  $s$  (in  $\text{m s}^{-1}$ ) is surface wind speed;  $T_{\text{soil}}$  (in  $^{\circ}\text{C}$ ) is soil temperature;  $l$  and  $l_{\text{max}}$  (both in  $\text{m}$ ) are the depth of each particular soil layer and the maximum depth of a soil column, respectively.

## S2 Supplementary figures

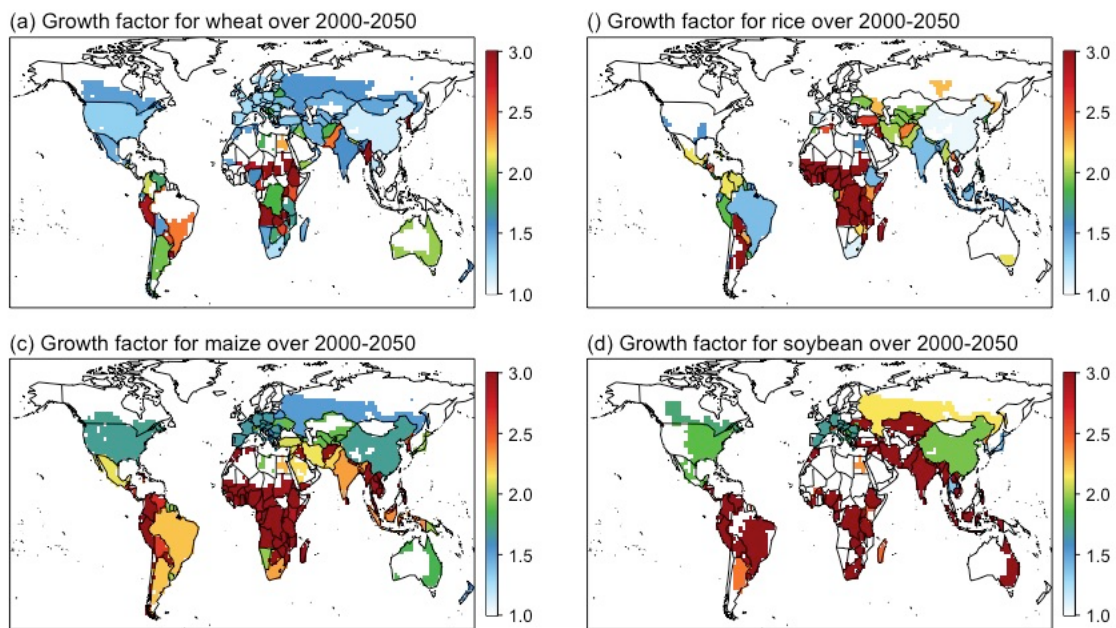

**Figure S1.** Growth factor of (a) wheat, (b) rice, (c) maize, and (d) soybean production increases over 2000–2050 from the Food and Agriculture Organization of the United Nations (FAO).

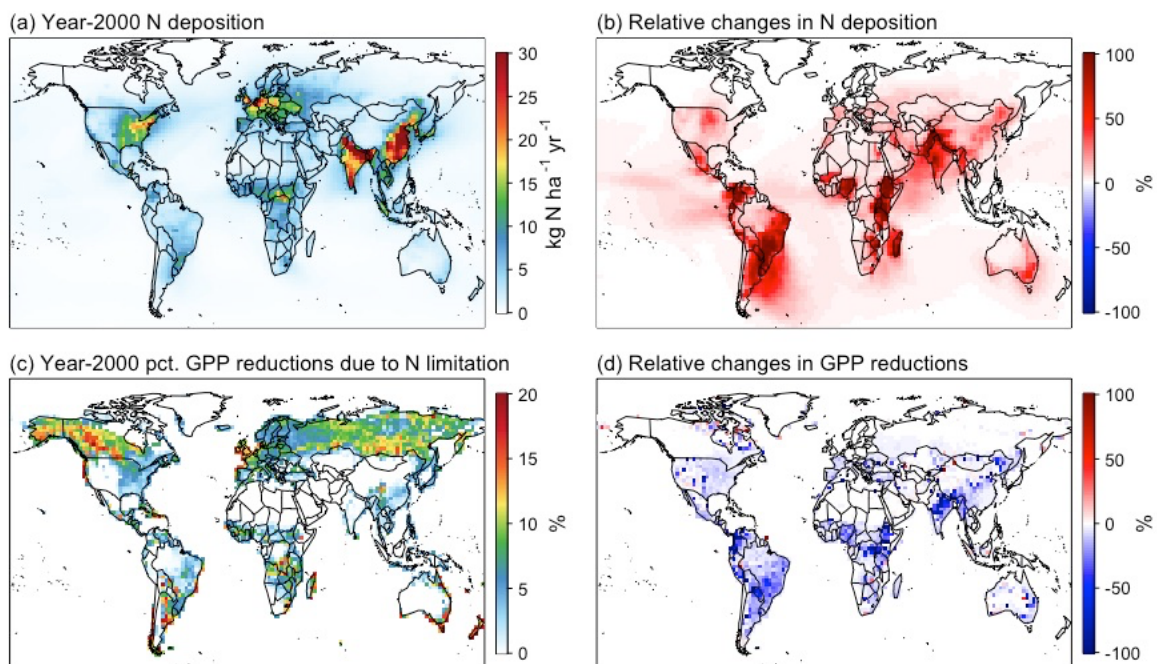

**Figure S2.** (a) Year-2000 atmospheric nitrogen deposition and (b) relative changes in nitrogen deposition over 2000–2050. (c) Year-2000 gross primary production (GPP) percentage reduction due to nitrogen limitation as presented in the CLM model. In nitrogen-limited soils (i.e., colored areas), plant growth is limited by insufficient soil nitrogen supply due to plant-microbe competition. (d) Relative changes in nitrogen limitation-induced GPP reductions because of enhanced nitrogen availability from atmospheric nitrogen deposition over 2000–2050. Same as Fig.3 but in relative changes.

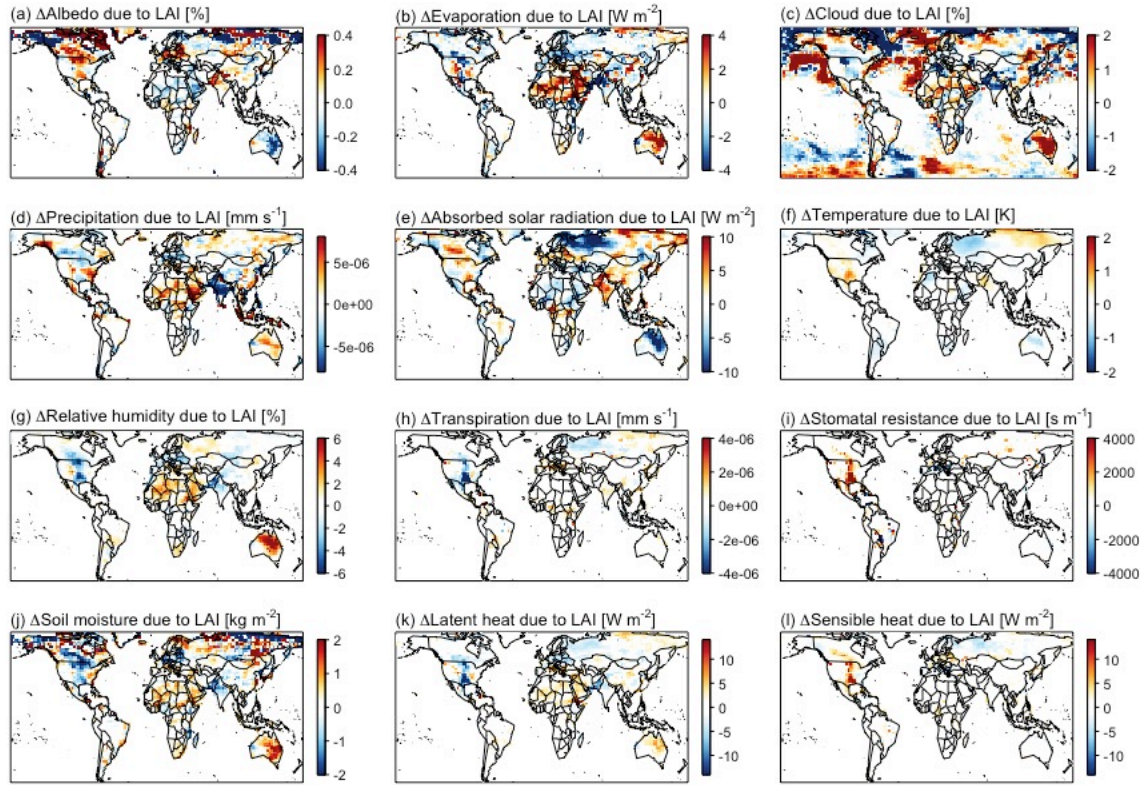

**Figure S3.** Summertime changes in (a) albedo, (b) ground evaporation, (c) cloud cover, (d) precipitation, (e) absorbed solar radiation, (f) surface temperature, (g) relative humidity, (h) vegetation transpiration, (i) stomatal resistance, (j) soil moisture, (k) latent heat flux, and (l) sensible heat flux driven by LAI increase with dynamic meteorology.



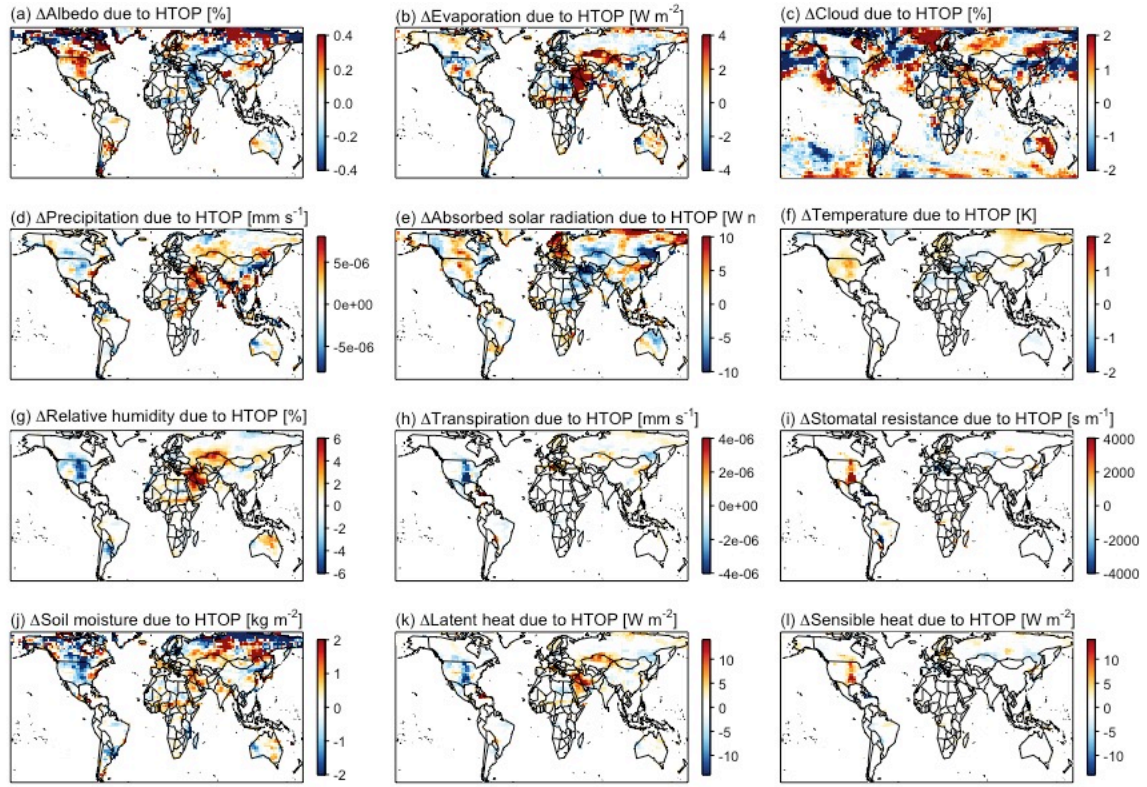

**Figure S4.** Same as Fig.S3 but driven by canopy height increase.

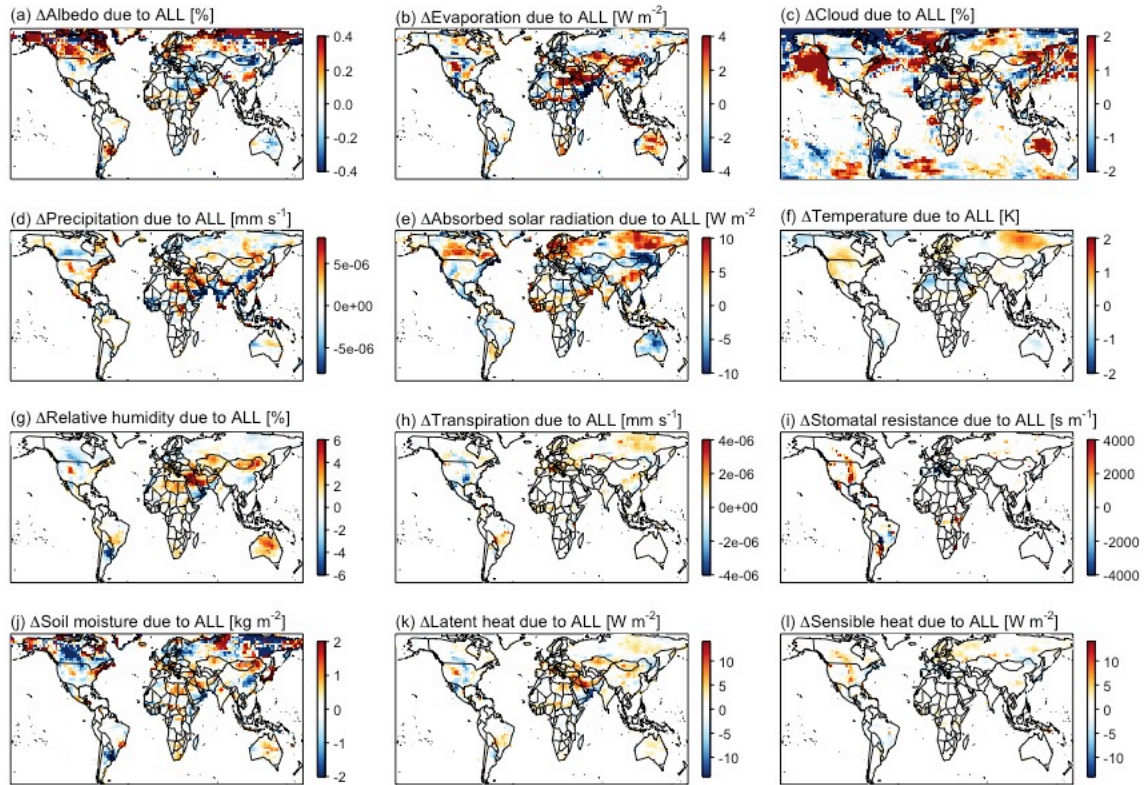

**Figure S5.** Same as Fig.S3 but driven by LAI, canopy height, and soil  $\text{NO}_x$  increase.

**Reference:**

- Balasubramanian, S., Koloutsou-Vakakis, S., McFarland, D. M. and Rood, M. J.: Reconsidering emissions of ammonia from chemical fertilizer usage in midwest USA, *J. Geophys. Res.*, 120(12), 6232–6246, doi:10.1002/2015JD023219, 2015.
- Balasubramanian, S., Nelson, A., Koloutsou-Vakakis, S., Lin, J., Rood, M. J., Myles, L. T. and Bernacchi, C.: Evaluation of DeNitrification DeComposition model for estimating ammonia fluxes from chemical fertilizer application, *Agric. For. Meteorol.*, 237–238, 123–134, doi:10.1016/j.agrformet.2017.02.006, 2017.
- Bonan, G. B., Levis, S., Kergoat, L. and Oleson, K. W.: Landscapes as patches of plant functional types: An integrating concept for climate and ecosystem models, *Global Biogeochem. Cycles*, 16(2), 5-1-5-23, doi:10.1029/2000gb001360, 2002.
- Davidson, E. A. and Trumbore, S. E.: Gas diffusivity and production of CO<sub>2</sub> in deep soils of the eastern Amazon, *Tellus B*, 47(5), 550–565, doi:10.1034/j.1600-0889.47.issue5.3.x, 1995.
- Del Grosso, S. J., Parton, W. J., Mosier, A. R., Ojima, D. S., Kulmala, A. E. and Phongpan, S.: General model for N<sub>2</sub>O and N<sub>2</sub> gas emissions from soils due to denitrification, *Global Biogeochem. Cycles*, 14(4), 1045–1060, doi:10.1029/1999GB001225, 2000.
- Li, C., Aber, J., Stange, F., Butterbach-Bahl, K. and Papen, H.: A process-oriented model of N<sub>2</sub>O and NO emissions from forest soils: 1. Model development, *J. Geophys. Res. Atmos.*, 105(D4), 4369–4384, doi:10.1029/1999JD900949, 2000.
- Li, C., Salas, W., Zhang, R., Krauter, C., Rotz, A. and Mitloehner, F.: Manure-DNDC: A biogeochemical process model for quantifying greenhouse gas and ammonia emissions from livestock manure systems, *Nutr. Cycl. Agroecosystems*, 93(2), 163–200, doi:10.1007/s10705-012-9507-z, 2012.
- Parton, W. J., Holland, E. A., Del Grosso, S. J., Hartman, M. D., Martin, R. E., Mosier, A. R., Ojima, D. S. and Schimel, D. S.: Generalized model for NO<sub>x</sub> and N<sub>2</sub>O emissions from soils, *J. Geophys. Res. Atmos.*, 106(D15), 17403–17419, doi:10.1029/2001JD900101, 2001.
- Parton, W. J., Holland, E. A., Del Grosso, S. J., Hartman, M. D., Martin, R. E., Mosier, A. R., Ojima, D. S. and Schimel, D. S.: Generalized model for NO<sub>x</sub> and N<sub>2</sub>O emissions from soils, *J. Geophys. Res. Atmos.*, 106(D15), 17403–17419, doi:10.1029/2001jd900101, 2004.
- Xu, R. and Prentice, I. C.: Terrestrial nitrogen cycle simulation with a dynamic global vegetation model, *Glob. Chang. Biol.*, 14(8), 1745–1764, doi:10.1111/j.1365-2486.2008.01625.x, 2008.
- Zhang, Y. and Niu, H.: The development of the DNDC plant growth sub-model and the application of DNDC in agriculture: A review, *Agric. Ecosyst. Environ.*, 230, 271–282, doi:10.1016/j.agee.2016.06.017, 2016.
- Zhao, Y., Zhang, L., Tai, A. P. K., Chen, Y. and Pan, Y.: Responses of surface ozone air quality to anthropogenic nitrogen deposition in the Northern Hemisphere, *Atmos. Chem. Phys.*, 17(16), 9781–9796, doi:10.5194/acp-17-9781-2017, 2017.
